# Supplementary material for: Reinforcement versus Fluidization in Cytoskeletal Mechanoresponsiveness
Source: PubMed Central journal article supplement (PMC2675060; doi:10.1371/journal.pone.0005486), 2009-05-08

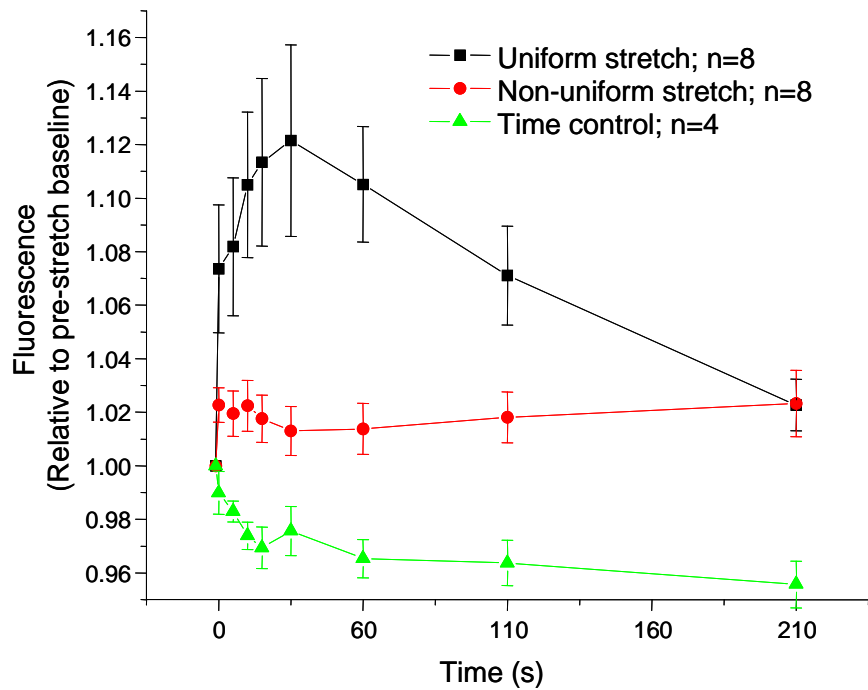

Supplement: pone.0005486.s006.pdf [file pone.0005486.s006.pdf]
