# Supplementary material for: Reinforcement versus Fluidization in Cytoskeletal Mechanoresponsiveness
Source: PubMed Central journal article supplement (PMC2675060; doi:10.1371/journal.pone.0005486), 2009-05-08
Supplement: pone.0005486.s007.pdf [file pone.0005486.s007.pdf]

|                                                                                                                                                                                                                                                                                                       | Contractile moments at baseline, T <sub>0</sub> (pNm) average $\pm$ std. error | No. of cells (n)                                        | Concentration (M) and incubation time (min) |
|-------------------------------------------------------------------------------------------------------------------------------------------------------------------------------------------------------------------------------------------------------------------------------------------------------|--------------------------------------------------------------------------------|---------------------------------------------------------|---------------------------------------------|
| HASM<br>Homogeneous,4s,single(gray)<br>Non-homogenous, 4s,single(brown)<br><br>Homogeneous,4s,multiple(gray)<br>Non-homogenous,4s,multiple(brown)<br><br>Homogeneous,30s,single(gray)<br>Non-homogenous,30s,single(brown)<br><br>Homogeneous,30s,multiple(gray)<br>Non-homogenous,30s,multiple(brown) | 28.88 $\pm$ 5.34*                                                              | 90<br>12<br>5<br><br>5<br>4<br><br>5<br>9<br><br>5<br>5 | -                                           |
| HASM PAO<br>Homogeneous,4s,multiple(yellow)<br>Non-homogeneous,4s,multiple(yellow)                                                                                                                                                                                                                    | 15.35 $\pm$ 2.20*                                                              | 24<br>4<br>6                                            | 50 nM; 15 min                               |
| HASM EGTA<br>Homogeneous,4s,multiple(blue)<br>Non-homogeneous,4s,multiple(blue)                                                                                                                                                                                                                       | 29.22 $\pm$ 11.23                                                              | 14<br>4<br>5                                            | 10 mM; 15 min                               |
| HASM GdCl <sub>3</sub><br>Homogeneous,4s,multiple(pink)<br>Non-homogeneous,4s,multiple(pink)                                                                                                                                                                                                          | 32.7 $\pm$ 8.77                                                                | 12<br>5<br>6                                            | 25 $\mu$ M; 15 min                          |

\* p < 0.05
